1           **Fast targeting of antigen and surface-derived MHCII into degradative**  
2           **compartments implies endosomal rewiring for antigen presentation in B cells**

3  
4   Running title: **B cell early peripheral MIICs**

5  
6   Hernández-Pérez S<sup>1\*</sup>, Vainio M<sup>1\*</sup>, Kuokkanen E<sup>1</sup>, Sustar V<sup>1</sup>, Rajala J<sup>1</sup>, Paavola V<sup>1</sup>, Petrov P<sup>1</sup>,  
7   Awoniyi LO, Sarapulov AV, Försten S<sup>1</sup>, Vihinen H<sup>2</sup>, Jokitalo E<sup>2</sup>, Bruckbauer A<sup>3</sup>, and Mattila PK<sup>1</sup>

8  
9   <sup>1</sup> Institute of Biomedicine, MediCity Research Laboratories, University of Turku, Finland

10   <sup>2</sup> Institute of Biotechnology, Electron Microscopy Unit, University of Helsinki, Finland

11   <sup>3</sup> Facility for Imaging by Light Microscopy (FILM), National Heart and Lung Institute, Imperial  
12   College London, UK

13  
14   \* the authors contributed equally to the study.

15  
16   **Corresponding author:**

17   **Pieta Mattila**

18   Tel: +358 50 574 0780

19   Fax: +358 2 333 7000

20   E-mail: pieta.mattila@utu.fi

21  
22   **Keywords:** Adaptive immune system, B cells, antigen processing, B cell receptor, BCR, MHCII,  
23   peptide-loading, endosomes, vesicle traffic

24   **List of Symbols and Abbreviations used:** BCR, B cell receptor; MHCII, major histocompatibility  
25   complex Class II; pMHCII, peptide-MHCII; MIIC, MHCII peptide-loading compartment; SDCM,  
26   spinning disk confocal microscopy; EE, early endosome; LE, late endosome; RE, recycling  
27   endosome; CatS, cathepsin S

28  
29   **Abstract**

30   In order to mount high-affinity antibody responses, B cells internalise specific antigens and process  
31   them into peptides loaded onto MHCII for presentation to T<sub>H</sub> cells. While the biochemical  
32   principles of antigen processing and MHCII loading have been well dissected, how the endosomal  
33   vesicle system is wired to enable these specific functions remains much less studied. Here, we

34 performed a systematic microscopy-based analysis of antigen trafficking in B cells to reveal its  
35 route to the MHCII peptide-loading compartment (MIIC). Surprisingly, we detected fast targeting  
36 of internalised antigen into peripheral acidic compartments that possessed the hallmarks of MIIC  
37 and also showed degradative capacity. In these vesicles, internalised antigen converged rapidly with  
38 membrane-derived MHCII and partially overlapped with Cathepsin-S and H2-M, both required for  
39 peptide loading. These early compartments appeared heterogenous and atypical as they contained a  
40 mixture of both early and late markers, indicating specialized endosomal route. Together, our data  
41 suggests that, in addition to previously-reported perinuclear late endosomal MIICs, antigen  
42 processing and peptide loading could start already in these specialized early peripheral acidic  
43 vesicles to support fast peptide-MHCII presentation.

## 44 **Introduction**

45 B lymphocytes (B cells) are an essential part of the adaptive immune system, initiating antibody  
46 responses against a vast repertoire of different antigens. Critical for the ability of B cells to mount a  
47 mature antibody response including class-switch recombination and affinity maturation, is the  
48 presentation of specific antigen-derived peptides loaded onto the major histocompatibility complex  
49 (MHC) class II (MHCII). Presentation of peptide-MHCII (pMHCII) complex on the B cell surface  
50 enables them to act as antigen-presenting cells (APCs) to CD4<sup>+</sup> T lymphocytes (T helper cells, T<sub>H</sub>  
51 cells). T cell receptor (TCR)-pMHCII interaction provides a second activation signal to the B cells.  
52 Reciprocally, pMHCII presented on B cells stimulates cognate T<sub>H</sub> cells to orchestrate other  
53 branches of the immune system and to generate CD4<sup>+</sup> T cell memory (Whitmire et al., 2009).

54  
55 Presentation of different antigenic peptides on MHCII is a critical driver of various adaptive  
56 immune responses. Other professional APCs, such as dendritic cells and macrophages, present  
57 peptides from unspecified antigens taken up by phagocytosis or via receptor-mediated uptake of  
58 innate type of immune receptors, like complement receptors or Fc-receptors. B cells, however,  
59 ensure efficient presentation of antigens of given specificity, determined by the B cell antigen  
60 receptor (BCR) (Aluvihare et al., 1997; Unanue et al., 2016). Studies on pMHCII loading have  
61 largely focused on dendritic cells and macrophages, leaving B cell antigen processing and  
62 presentation less understood.

63  
64 The MHCII peptide-loading compartment (MIIC), where antigen is processed into peptides for  
65 loading onto MHCII molecules, contains in addition to its main hallmarks, antigen and MHCII, the  
66 key peptide loading chaperone H2-M and the proteolytic enzyme Cathepsin-S (Adler et al., 2017).  
67 MIIC has been well characterized by various biochemical fractionation techniques. However, in  
68 these assays the information about the heterogeneity, localization and dynamics of the vesicles is  
69 typically lost. Therefore, important questions remain about the coordination of antigen processing  
70 and MHCII loading and presentation. How is the endosomal vesicle machinery of B cells tuned to  
71 enable this highly specific process and how is the efficient targeting of BCR-derived antigen for  
72 processing coordinated? It has been suggested that MIICs are multivesicular and typically contain a  
73 late endosomal / lysosomal marker Late Antigen Membrane Protein 1 (LAMP1) (Lankar et al.,  
74 2002; Unanue et al., 2016; Adler et al., 2017). Thus, a picture has been outlined where the  
75 maturation of MIIC diverts at the stage of multivesicular bodies (MVB) before fusion with end-  
76 stage lysosome. However, it is not understood how this process is regulated. To help to decipher the

77 molecular underpinnings of antigen presentation, deeper knowledge on intracellular trafficking of  
78 antigen would be required.

79

80 In the last 10-15 years, developments in fluorescence microscopy techniques, including improved  
81 fluorophores and fluorescent fusion proteins, as well as more sensitive and higher resolution  
82 imaging modalities, have significantly increased our general understanding of intracellular vesicle  
83 traffic. Microscopy can provide information about the dynamics and heterogeneity of different  
84 vesicle carriers that are otherwise challenging to decipher with other techniques. The classical or  
85 ubiquitous endolysosomal pathway is delineated as a route from early endosomes (EE) to late  
86 endosomes (LE) / MVB and, lastly, to lysosomes, with early and late recycling endosomes (RE)  
87 sending cargo back to the cell surface. While this general view is relatively well established, new  
88 studies continue to reveal dramatic complexity within the endolysosomal system with numerous  
89 vesicle sub-populations, transport proteins and vesicle markers as well as vesicle scission and  
90 fusion machineries (Chen et al., 2019; Delevoeye et al., 2019; Huotari and Helenius, 2011). A group  
91 of vital regulators of vesicle traffic are the small GTPases of the Rab protein family that are widely  
92 used to define different endolysosomal sub-populations. This family contains more than 60 proteins  
93 in humans performing either ubiquitous or specific functions in vesicle traffic (Wardinger-Ness &  
94 Zerial, 2014). The appreciation of the role of the Rab proteins has been key in unravelling the  
95 endosomal network dynamics. However, different carriers vary not only in terms of their Rab  
96 identity markers, but also in size, shape, membrane morphology, subcellular localization and  
97 acidity. In addition, identification of different cell-type specific variations of vesicular transport  
98 systems and diverse specialized endolysosome-related organelles, where MIIC could be counted in  
99 (Delevoeye et al., 2019), pose an ongoing challenge for researchers.

100

101 In this work, we set up a systematic microscopy approach to follow how antigen, after BCR-  
102 mediated internalisation, traffics into MIIC. In accordance to previous studies, we detected and  
103 quantified gradual clustering of antigen vesicles towards perinuclear region in 30-60 min. Right  
104 after internalisation, antigen appeared in heterogenous vesicles that harboured mixed selection of  
105 both early and late endosomal markers. Interestingly, already these early compartments in the cell  
106 periphery accumulated hallmarks of MIIC and were able to gain degradative capacity. By specific  
107 visualization of membrane-derived MHCII molecules, we found that in these early antigen  
108 compartments, MHCII originated largely from the plasma membrane pool, possibly to support fast,  
109 first-wave peptide presentation. This study provides the first in-depth imaging of antigen processing  
110 pathway in B cells. We found remarkable efficiency in joint targeting of antigen and membrane-

111 derived MHCII into peripheral compartments with hallmarks of MIIC. The results increase our  
112 understanding of the endolysosomal machinery responsible for MIIC formation and can facilitate  
113 future dissections of the regulation of successful antigen presentation.

## 114 **Results**

115

### 116 *Antigen migrates into the perinuclear area in 30-60 min after activation*

117 To characterize antigen vesicle trafficking in B cells, we first set to analyse the migration and  
118 clustering of antigen in a quantitative manner. We used cultured A20 B cells expressing transgenic  
119 D1.3 IgM (A20 D1.3) and activated them with Alexa Fluor-labelled anti-IgM antibodies (AF-  
120  $\alpha$ IgM) as surrogate antigen. The localization of the antigen vesicles was imaged in cells fixed at  
121 different timepoints and stained for pericentriolar material 1 (PCM1) as a marker for microtubule  
122 organizing centre (MTOC) by spinning disc confocal microscopy (SDCM). Well consistent with the  
123 literature (Aluvihare et al., 1997; Siemasko et al., 1998; Tsui et al., 2018; Vascotto et al., 2007a),  
124 we found that, within 30-60 min, most cells gathered antigen in a cluster that typically localized  
125 quite centrally in the vicinity of MTOC (Fig. 1A). The same phenomenon was also detected in  
126 splenic primary B cells isolated from MD4 mouse strain, selected for their relatively high and  
127 homogenous levels of IgM. Primary B cells, however, showed faster kinetics with most cells  
128 accumulating antigen in central clusters already in less than 30 min (Fig. 1B). To quantitatively  
129 analyse antigen migration, we deconvolved the images to improve the separation of small vesicles  
130 and then quantified the total number of vesicles per cell and their mean distance to the MTOC using  
131 MatLab-based 3D analysis (Fig. 1C). By showing a reduction of the vesicle numbers over time, the  
132 analysis clearly demonstrated the fusion, or clustering, of vesicles into bigger entities. At the same  
133 time, the average distance to the MTOC decreased, depicting migration of the vesicles closer to the  
134 MTOC over time (Fig. 1D, E). Although the vesicle number diminished between 30 and 45 min, the  
135 mean distance of the vesicles to the MTOC remained constant. This suggested that the majority of  
136 the antigen was trafficked to the perinuclear region already in 30 min, but vesicle fusion events  
137 and/or clustering continued at later timepoints (Fig. 1E). The quantification revealed the overall  
138 kinetics of the antigen transition from smaller peripheral vesicles into bigger vesicles or vesicle  
139 clusters that accumulate close to the MTOC.

140

141 In order to gain insights into the morphological features of the antigen vesicles, we activated the  
142 A20 D1.3 cells with a mixture of AF- $\alpha$ IgM and 6 nm-colloidal gold- $\alpha$ IgM and used transmission  
143 electron microscopy (TEM) to visualize antigen-containing membrane structures. We found high  
144 heterogeneity in the vesicle morphologies both after 15 min of activation and after 75 min of  
145 activation when the antigen was largely concentrated in the middle of the cells (Fig. 1F). In the 15  
146 min timepoint, we found antigen in spherical or horse-shoe shaped single membrane vesicles, as

147 well as in tubular or network-like structures, which often contained intraluminal vesicles (Fig. 1F;  
148 Supplementary Fig. 1A). MVBs are typically considered to represent late endosomes, and for  
149 MIICs, MVB-like structures have been characterized after 1h of activation in the perinuclear region  
150 (Adler et al., 2017; Lankar et al., 2002; Unanue et al., 2016; Vascotto et al., 2007b). While  
151 multivesicular morphology has been linked to MHCII loading (Roche and Furuta, 2015; Lith et al.,  
152 2001; Xiu et al., 2011), the localization of antigen into multivesicular structures raised the question  
153 whether already at 15 min after activation, in the cell periphery, antigen could be in MIIC. At 75  
154 min timepoint, we found antigen predominantly in multivesicular structures accumulated in the  
155 perinuclear area. This region was also very dense in various other membrane organelles, such as  
156 Golgi and mitochondria. Consistent with the literature (Vascotto et al., 2007a), we also typically  
157 found these vesicle-dense areas at sites of nuclear invaginations (Fig. 1F). The possible effect of  
158 colloidal gold-conjugation to the localization of anti-IgM was controlled by immunofluorescence  
159 analysis of sample duplicates. We detected strong colocalisation of fluorescently labelled anti-IgM  
160 and gold-conjugated anti-IgM, distinguished by a specific secondary staining. Both antigens also  
161 accumulated together into perinuclear Rab7 compartment at 75 min timepoint similarly to the  
162 samples without colloidal gold (Supplementary Fig. S1B; see Fig. 1A and Fig. 2B).

163

#### 164 ***Antigen colocalisation with early and late endosomal Rab-proteins***

165 Mechanisms of endosomal trafficking in various cellular systems are largely governed by Rab-  
166 family of small GTPases, which are commonly used to define sub-populations of vesicles with  
167 different functions. To reveal the endolysosomal character of the vesicles transporting antigen, we  
168 designed a series of colocalisation analyses with the following classical endosomal markers: Rab5  
169 for EEs, Rab7 and Rab9 for LEs and lysosomes, and Rab11 for REs. As antigen-bound BCR is  
170 known to form clusters at the cell membrane prior to endocytosis, we first examined the proportion  
171 of the dot-like antigen features that was internalised at 10-20 min timepoints, and thus would be  
172 expected to colocalise with vesicular markers. At these early timepoints most vesicles still remain in  
173 the cell periphery and it is not readily apparent if the antigen is internalised or just clustered at the  
174 plasma membrane. To distinguish the internalised antigen from the antigen still on the plasma  
175 membrane, we stimulated the cells with biotinylated AF- $\alpha$ IgM. After 10-60 min activation, cells  
176 were stained on ice with fluorescent streptavidin and fixed (Supplementary Fig. S2A). In this way,  
177 we were able to distinguish between total (Alexa Fluor 647) and membrane-exposed (Alexa Fluor  
178 488) antigen. We saw that in 10-20 min, approximately 40-50% of the dotted antigen features in the  
179 images represented internalised vesicles, while the rest of the signal originates from antigen that  
180 still remains at the cell surface. As expected, at later timepoints (60 min), majority of the antigen

181 pool was detected inside the cells (Supplementary Fig. S2B, C). This was well consistent with the  
182 flow cytometric analysis of antigen internalisation (Supplementary Fig. S2D). Consistently, we also  
183 frequently found non-internalised antigen at the plasma membrane in TEM samples after 15 min of  
184 activation (Supplementary Fig. S1A).

185

186 To study the colocalisation of antigen and different vesicle markers, we performed  
187 immunofluorescence analysis with SDCM. We expected to see clearly higher colocalisation of  
188 antigen with early endosomal Rab5 in the early timepoints, and with late endosomal markers at later  
189 timepoints. To our surprise, we did not detect major differences between the markers. Instead,  
190 Rab5, Rab7, Rab9 and Rab11 all showed prominent punctate pattern of vesicles very close to the  
191 plasma membrane that partially overlapped with antigen and partially located just underneath the  
192 antigen signal (Fig. 2A, C; Supplementary Fig. S3A). As a negative control, we used Golgi-specific  
193 transport protein Rab6 and, as expected, it showed no notable colocalisation with antigen. We  
194 quantified the colocalisation using Manders' overlap coefficient, split for antigen channel (M2)  
195 (Manders et al., 1993), using Huygens software with automated thresholding. M2 measures the  
196 portion of antigen that overlaps with the signal from different Rab-proteins. The analysis supported  
197 partial colocalisation of antigen with Rab5, Rab7, Rab9 and Rab11, already at early timepoints after  
198 activation (Fig. 2C).

199

200 At 60 min timepoint, when most of the antigen was clustered in the perinuclear region, we found  
201 enhanced colocalisation with late endosomal markers Rab7 and Rab9, as expected (Fig. 2B,  
202 Supplementary Fig. S3B). Rab11, involved in slow recycling, also localized to the antigen cluster as  
203 well as the early endosomal marker Rab5. The negative control, Rab6, was found in the perinuclear  
204 region close to antigen but with very limited overlap in signals. This suggested translocation of the  
205 antigen close to the Golgi apparatus, supporting the above observed localization close to the MTOC  
206 (Fig. 1). The quantification suggested significant overlap of antigen with all the studied Rab-  
207 proteins except Rab6, with an increasing trend over time (Fig. 2C).

208

209 Majority of the vesicles were found very close to each other, both at the early and late time points,  
210 at the vicinity of the plasma membrane or in the perinuclear region, respectively, leading to  
211 overestimation of the signal overlap. In order to improve the resolution of our data and to better  
212 separate different vesicles, we employed super-resolution radial fluctuations (SRRF), an imaging  
213 method based on post-processing analysis of signal fluctuations (Gustafsson et al., 2016). Here, we  
214 analysed samples activated for 10 or 45 min in order to resolve the nature of the antigen vesicles in



215 the perinuclear region. Super-resolution SRRF images were obtained by taking 20-50 repetitive  
216 images of the same field of view with SDCM and post-processing the data using SRRF plugin in  
217 ImageJ. In this way, we could improve the separation of the vesicles significantly and now detected  
218 more distinct differences in the localization of Rab-proteins with respect to antigen, especially in  
219 later timepoints. In 45 min, Rab7 and Rab9 showed clear colocalisation with antigen, as expected  
220 for their late endosomal nature, while Rab5 and Rab11 appeared more scattered and only partially  
221 colocalised with antigen, often marking vesicles or membrane domains adjacent to it (Fig. 2D). We  
222 analysed SRRF images for Manders' overlap coefficient (M2) and detected a marked colocalisation  
223 of antigen signal with late endosomal markers Rab7 and Rab9 in 45 min. We also detected overlap  
224 with Rab11, and, to some extent, with Rab5. However, in 10 min the analysis showed close to equal  
225 colocalisation of Rab5, Rab7 and Rab9, and a modest level of colocalisation with Rab11.  
226 Colocalisation of antigen with Rab6 remained low, confirming the specificity of the analysis (Fig.  
227 2E). The presence of Rab11 in the antigen vesicles could suggest fission and recycling, to some  
228 extent already at early timepoints but with increasing efficiency towards later timepoints.

229

### 230 *Antigen trafficking involves atypical vesicles that share both early and late endosomal character*

231 To better define antigen transport vesicles, we asked how other typical early and late endosomal  
232 markers, Early Endosome Antigen 1 (EEA1) and LAMP1, respectively, correlated with antigen at  
233 different timepoints. Consistent with the data on different Rab-proteins, we detected partial  
234 colocalisation of antigen with both EEA1 and LAMP1 already at early timepoints (Fig. 3A,  
235 Supplementary Fig. S3C). The colocalisation became more prominent as antigen trafficked to the  
236 perinuclear region (Fig. 3B, Supplementary Fig. S3D). Manders' overlap coefficient also showed  
237 continuous or perhaps even increasing overlap with antigen for both markers (Fig. 3C). However,  
238 Pearson's correlation coefficients for EEA1 and LAMP1 crossed over time indicating that  
239 significantly higher proportion of LAMP1 compared to EEA1 colocalised with antigen at later  
240 timepoints. This is consistent with a high proportion of EEA1 endosomes remaining in the cell  
241 periphery, while some coalesce in the central cluster together with antigen, as shown by the M2. On  
242 the other hand, increasing proportion of LAMP1-positive vesicles accumulated in the perinuclear  
243 region with antigen over time.

244

245 As a complementary approach, we again turned to SRRF super-resolution analysis in order to  
246 achieve higher accuracy. We examined the colocalisation of antigen with EEA1 and LAMP1 at 10  
247 and 45 min after activation. SRRF analysis confirmed higher colocalisation of antigen with EEA1  
248 compared to LAMP1 in the early timepoints (10 min), and vice versa after 45 min (Fig. 3D-E).

249 Nevertheless, EEA1 colocalisation with antigen was also detected both in some remaining  
250 peripheral vesicles and in the perinuclear antigen vesicle cluster, raising a possibility that also early  
251 endosomal EEA1 could indeed localize to the MIIC. Together, this data revealed surprising  
252 localization of antigen with not only early, but also late endosomal carriers shortly after  
253 internalisation. At later timepoints, close to the MTOC, preference for late endosomal / lysosomal  
254 markers was notable, yet also early endosomal markers were found to overlap with antigen.

255

256 As previous shown (Supplementary Fig. S2B-C), in 15 min approximately half of the dots with  
257 antigen signal should represent vesicles inside the cell, and the rest should originate from antigen-  
258 BCR clusters still at the plasma membrane. Therefore, M2 values for one type of vesicle marker  
259 should not be considerably higher than 50% in the early timepoints. Our observation that antigen  
260 showed an overlap of 40-60% with both early and late endosomal markers can simply reflect  
261 technical challenges to resolve small vesicles close to each other, causing adjacent vesicles to  
262 appear as colocalised. Additionally, it could point towards mixed vesicle identities that would  
263 simultaneously possess both early and late markers. To test for these two non-exclusive scenarios,  
264 we next performed SRRF super-resolution analysis on cells activated either for 10 or 45 min and  
265 stained for LAMP1 and EEA1, and asked if the markers colocalised in the same antigen vesicles.  
266 We found antigen vesicles that colocalised with only either EEA1 or LAMP1, but we also found  
267 several prominent vesicles that clearly contained both markers simultaneously (Fig. 3F).

268

269 Next, we asked if the vesicles that share both early and late endosomal markers were in the  
270 transition state of their maturation or if they represented a special compartment. To investigate this,  
271 we performed live imaging of A20 D1.3 B cells transfected with green fluorescent protein (GFP)-  
272 fused Rab5 and loaded with LysoTracker, a fluorescent tracer that labels low pH compartments,  
273 such as LEs and lysosomes. We followed antigen vesicles at early timepoints after internalisation  
274 by SDCM. We detected several antigen vesicles that contained both early endosomal Rab5 and  
275 LysoTracker (Fig. 3G; Supplementary Movie 1). The joint movement of the markers implied  
276 physical colocalisation, and indicated that antigen, indeed, traffics in atypical vesicles that share  
277 both early and late endosomal features. Interestingly, we detected double positive vesicles also  
278 before cell activation (Supplementary Fig. 4).

279

### 280 *Antigen enters degradative compartments shortly after internalisation*

281 As the primary purpose of antigen uptake by B cells is to degrade it for loading the resulting  
282 peptides onto MHCII complexes, we next asked the question where and when does the antigen

283 degradation start. We linked a fluorescent probe for proteolysis, DQ-OVA, to  $\alpha$ IgM or specific  
284 HEL antigen recognized by the D1.3 BCR (Fig. 4A). Fluorescent DQ moieties quench each other  
285 when the probe remains intact. However, upon proteolysis the quenching ceases and the  
286 fluorescence can be detected. We first analysed the increase in DQ fluorescence by flow cytometry.  
287 Already at 15-20 min we detected a clear signal that constantly increased through the analysis  
288 period, 45 min, suggesting that the proteolysis starts relatively fast after antigen uptake (Fig. 4B).  
289 We detected brighter DQ-Ova signal at later timepoints when linked to HEL, despite having similar  
290 internalisation rate to anti-IgM (see Supplementary Fig. S2D). Due to the brighter signal of DQ-  
291 Ova conjugated to HEL, we performed the microscopy analysis using this probe. Fluorescence  
292 signal from antigen-linked DQ moieties was also visible by microscopy at 20 min after activation.  
293 The DQ-signal overlapped well with EEA1 and was also found to colocalise with CatS, an enzyme  
294 essential for preparing the MHCII for peptide loading (Fig. 4C).

295

296 To investigate the level of antigen colocalisation with CatS in a more comprehensive way, we  
297 performed immunofluorescence analysis in cells activated for 10 or 45 min. Conventional SDCM  
298 imaging suggested partial colocalisation of CatS with antigen both at 10 and 45 min timepoints  
299 (Fig. 4D, upper panel). In order to resolve the vesicles better, we performed SRRF analysis, and  
300 could more unambiguously detect antigen vesicles that clearly contained CatS already 10 min after  
301 activation (Fig. 4D, middle panel). Interestingly, the colocalisation level remained roughly similar,  
302 although low, in the later timepoints in the perinuclear region (Fig. 4D, bottom panel;  
303 Supplementary Fig. 5A).

304

305 Proteolytic activity typically requires acidic pH of the vesicles. To examine the pH of the antigen  
306 vesicles, we used live imaging with LysoTracker, as its accumulation is based on acidic pH. In line  
307 with our data above (Fig. 3G), we found strong colocalisation of antigen with LysoTracker already  
308 in the very early timepoints (1-5 min after activation) (Fig. 4E; Supplementary Movie 2). Notably,  
309 we also detected antigen fusing with LysoTracker positive vesicles immediately after  
310 internalisation, indicating very fast and efficient targeting of antigen to acidic vesicles (Fig. 4F;  
311 Supplementary Movie 3). Curiously, LysoTracker positive vesicles appeared to hover beneath the  
312 plasma membrane ready to catch the internalised antigen.

313

#### 314 ***Antigen colocalises with plasma membrane derived MHCII rapidly after internalisation***

315 The data above suggests that antigen processing could be initiated already in the peripheral antigen  
316 vesicles shortly after internalisation. To ask if these early peripheral vesicles might represent MIIC,

317 we asked whether they also contain MHCII. We activated the cells for 10 or 60 min with  
318 fluorescent antigen and performed immunofluorescence staining of total MHCII. As expected, we  
319 found MHCII to strongly colocalise with antigen in the perinuclear antigen cluster at 30 min  
320 timepoint. Interestingly, after 10 min of activation, we also detected MHCII in various intracellular  
321 vesicles including those containing antigen (Supplementary Fig. S5B). Due to the high signal  
322 originating from the plasma membrane-resident MHCII and several internal MHCII-positive  
323 structures, we decided to analyse the samples with a super-resolution technique structured  
324 illumination microscopy (SIM). SIM significantly improved the resolution and clarity of the  
325 imaging (x-y-z), and we could detect strong colocalisation of antigen and MHCII in clearly defined  
326 vesicles already at 15 min after cell activation (Fig. 5A).

327

328 To investigate if the MHCII in the early antigen vesicles was newly synthesized from the trans-  
329 Golgi network, or originated from the plasma membrane pool, we prelabelled the surface MHCII  
330 prior to cell activation (Fig. 5B). Interestingly, we saw a strong localization of surface-derived  
331 MHCII (sMHCII) to early peripheral antigen vesicles (Fig. 5C). We then proceeded to verify the  
332 colocalisation by performing live imaging of cells labelled with fluorescent anti-MHCII prior to  
333 activation with fluorescent antigen. The movies revealed very high level of sMHCII in the antigen  
334 vesicles (Fig. 5D, Supplementary Movie 4). Finally, to further prove that the early peripheral  
335 antigen vesicles could function as MIIC, we stained the cells for H2-M, a molecule of MHC family  
336 that functions as a key chaperone in peptide loading to MHCII (Mellins and Stern, 2014). Notably,  
337 SRRF super-resolution imaging of immunofluorescence samples showed clear colocalisation of  
338 antigen vesicles and H2-M already at 15 min after activation further supporting classification of  
339 these early peripheral antigen vesicles as MIIC (Fig. 5E; Supplementary Fig. 5C).

340

## 341 **Discussion**

342

343 BCR-mediated uptake of specific antigens and their processing for pMHCII presentation is crucial  
344 for T cell-dependent antibody responses and BCR/antibody affinity maturation in the germinal  
345 centres. Different microscopy-based methods have become a critical tool in studying complicated  
346 vesicular networks and can now be used to tackle the endolysosomal system governing antigen  
347 processing in B cells. Here, we combined systematic colocalisation analysis of antigen with key  
348 markers of various endolysosomal compartments and known components of MIIC to gain  
349 information on antigen trafficking towards processing compartments. Consistent with previous  
350 studies (Aluvihare et al., 1997; Siemasko et al., 1998; Vascotto et al., 2007a), we observed that,

351 over time, antigen concentrates in the perinuclear region together with late endosomal markers  
352 LAMP1, Rab7 and Rab9, in compartments well-fitting to the description of MIIC. However, we  
353 also saw fast and highly efficient targeting of antigen into acidic compartments, that also possessed  
354 key features of MIIC, already in minutes after internalisation. These vesicles located in the cell  
355 periphery, displayed a heterogenous combination of early and late endosomal markers and also  
356 exhibited variable ultrastructural morphologies. Interestingly, we show robust recruitment of  
357 surface-derived MHCII to these early peripheral MIICs suggesting that they could support fast  
358 presentation using MHCII recycled from the plasma membrane. This work provides the first  
359 endosomal roadmap of the intracellular trafficking of antigen in B cells and reveals previously  
360 unappreciated efficacy in MIIC formation.

361

362 Much of our knowledge in B cell antigen processing compartments is derived from biochemical  
363 studies, including cell fractionations, radiolabelling of antigen, and electron microscopy  
364 (Amigorena et al., 1994; Lankar et al., 2002; West et al., 1994). While already these early studies  
365 drew a valid picture of late endosomal or lysosomal, i.e. LAMP1-positive, multivesicular  
366 compartment, the approaches were not suitable to address questions about intracellular localization  
367 or dynamics of the antigen vesicles. Yet, these features have been strongly linked to distinct  
368 functional properties of endolysosomes and they also inform us about the possible molecular  
369 machineries regulating the vesicle traffic (Huotari and Helenius 2011; Hutagalung and Novick,  
370 2011). Our microscopic analysis revealed a remarkable heterogeneity in the endolysosomal markers  
371 of antigen vesicles (Fig. 1-3). However, overlapping fluorescent signals could be derived from a  
372 vesicle containing two markers, two vesicles containing different markers, or a multilobular vesicle  
373 with distinct markers in different domains, not resolvable by conventional light microscopy.  
374 Therefore, the small size and crowdedness of the vesicles generated challenges for the  
375 colocalisation analyses, which we could, at least partially, overcome by the super-resolution SRRF  
376 and SIM analyses. While SDCM can achieve a lateral resolution of 250-300 nm, SIM and SRRF  
377 improve the x-y resolution by approximately 2-fold. SIM also improves the axial resolution by 2-  
378 fold from approximately 600 to 300nm.

379

380 The vesicle heterogeneity could be linked to the notion that antigen enters vesicles with low pH  
381 (LysoTracker-positive) and degradative capacity (demonstrated by DQ-Ova signal and partial  
382 overlap with CatS) extremely fast after internalisation (Fig. 4). It has also been shown that the  
383 amounts of Rab-proteins on a given vesicle can fluctuate, increasing the noise in the colocalisation  
384 parameters (Huotari and Helenius 2011; Hutagalung and Novick, 2011; Rink et al. 2005;

385 Vonderheit and Helenius 2005). Notably, we found that antigen also trafficked in atypical vesicles  
386 stably marked by both early endosomal Rab5 and LysoTracker indicating that the heterogeneity of  
387 the vesicles would be a more constant feature and not a mere transition state. Our data does not  
388 clearly fit the classical “Rab conversion” model, where a vesicle rapidly shifts from Rab5-positive  
389 into Rab7-positive (Huotari and Helenius, 2011; Hutagalung and Novick, 2011). Instead, the data  
390 might better comply with an alternative model, where sequential budding of membrane domains  
391 with late endosomal markers would occur from early/sorting endosomes (Huotari and Helenius  
392 2011; Wandinger-Ness and Zerial, 2014) and, indeed, we often detected adjacent localization of  
393 different markers possibly indicative of distinct domain on the same vesicle.

394

395 Martinez-Martin and colleagues used SIM to demonstrate, in primary B cells, that 15 min after  
396 activation, part of the internalised antigen concentrated in ring-like structures representing  
397 autophagosomes (Martinez-Martin et al., 2017). However, it remains unclear what could be the role  
398 of autophagy in terms of antigen fate or pMHCII processing. In our SIM analysis, we also detected  
399 some ring-like structures, that could represent autophagosomes (Fig. 5A) and the partial partitioning  
400 of antigen in these autophagosomes could be responsible for some of the vesicle heterogeneity we  
401 observed. Our data also does not rule out contribution of other vesicular carriers, like clathrin-  
402 independent carriers (CLICs), that do not contain specific markers (Kirkham et al., 2005).

403

404 An interesting finding from our live imaging data was that the LysoTracker positive, i.e. low pH  
405 vesicles, appeared to hover close to the plasma membrane and capture antigen right after  
406 internalisation (Fig. 4F). Some of these LysoTracker-positive vesicles also contained Rab5 already  
407 before cell activation (Supplementary Fig. S4). This effectiveness suggests prewiring of the B cells  
408 endolysosomal system towards antigen presentation, probably accompanied or boosted by a  
409 signalling component from the BCR, as suggested already by Siemasko and colleagues (Siemasko  
410 et al., 1998). As such, we support MIIC to be considered as a member of the growing family of  
411 specialized endolysosome-related organelles (ELRO) with diverse functions, as proposed in a  
412 recent review by Delevoye and colleagues (Delevoye et al., 2019). Considering the poor  
413 compliance of antigen vesicles with classical endolysosomal pathway, other ELROs could serve as  
414 valuable additional points of comparisons for studies of MIIC membrane traffic. It has been shown  
415 that B cells on activatory surfaces mimicking immunological synapses, polarize the MTOC and  
416 acidic MHCII vesicles to secrete proteases for antigen extraction (Yuseff et al., 2011). While this  
417 happens at later stages of activation and is proposed to precede antigen internalisation, it  
418 demonstrates atypical functions of B cell acidic compartments, perhaps analogous to the secretion

419 of lytic granules, another type of ELRO, by CD8<sup>+</sup> T cells (Delevoeye et al., 2019; Yuseff et al.,  
420 2013).

421

422 To test if antigen trafficking, despite of the observed heterogeneity, would depend on the classical  
423 early and late endosomal Rabs, we expressed various dominant negative or constitutively active  
424 mutants of Rab 5, 7, 9 and 11, but were not able to detect clear defects in antigen migration patterns  
425 (data not shown). This could point towards a hitherto unknown hardwiring in the system making  
426 these regulators redundant. Alternatively, the Rab mutants might not function as expected, as  
427 soundly demonstrated for the commonly used activating mutations that might not get activated in  
428 the first place (Langemeyer et al., 2014). In addition, redundancy is likely between isoforms and  
429 paralogs, like Rab5 isoforms a/b/c, or Rab7 and Rab9 which share high sequence homology and are  
430 suggested to play mutually redundant roles (Homma et al., 2019). Numerous other Rab-proteins  
431 have been shown to possess cell type or cargo-specific functions, linked to different ELROs. It is  
432 well possible that other Rab-proteins, not tested in this study, could serve as critical regulators of  
433 antigen vesicle trafficking. In dendritic cells, a genome-wide siRNA screen for molecules  
434 regulating MHCII distribution, has been performed (Paul et al., 2011). This screen did not highlight  
435 any Rab-family proteins, suggesting for considerable redundancy in the pathway.

436

437 Early biochemical studies, using lipopolysaccharide-activated B lymphoblasts, have proposed the  
438 existence of peptide-loaded MHCII in multiple endolysosomal compartments (Castellino and  
439 Germain, 1995) and, using the same B cell line than us, demonstrated that B cells can indeed  
440 present antigen already in 20 min after activation (Aluvihare et al., 1997). Furthermore, studies  
441 have shown antigen degradation into peptides 20 min after activation (Barroso et al., 2015;  
442 Davidson et al., 1990). These studies are consistent with our finding that the internalised antigen  
443 vesicles highly efficiently colocalise with MHCII in various compartments, as well as partially  
444 overlap with Cathepsin-S and H2-M (Fig. 4-5). The degradative capacity of the early peripheral  
445 vesicles (Fig. 4-5) further supports function in antigen processing. Interestingly, we found that the  
446 newly internalised antigen robustly co-localized with surface-derived MHCII (Fig. 5), suggesting  
447 that the pre-existing pool of MHCII could be used for the first wave of pMHCII presentation. This  
448 point has been previously tested using cycloheximide, known to block de novo protein synthesis.  
449 There, however, cycloheximide was found to inhibit all presentation and it was interpreted so that B  
450 cells could only present peptides on newly synthesized MHCII (Aluvihare et al., 1997). Later,  
451 concerns have been raised on the side effects of cycloheximide. These include disturbance of  
452 endosomal trafficking, actin cytoskeletal dynamics and cell polarization and motility (Clotworthy

453 and Traynor, 2006; Darvishi and Woldemichael, 2016; Oksvold et al., 2012). Thus, the old findings  
454 with cycloheximide warrant a revisit with a sensitive pulse assay for antigen presentation  
455 together with more specific inhibitors like, for example, the newly developed FLI-06 that targets  
456 ER-exit sites and trans-Golgi network (Yonemura et al., 2016). Our suggestion that biosynthetic  
457 MHCII probably arrives to MIIC at later stages, is supported by the old metabolic labelling studies,  
458 where, again using the same B cell line than in our study, it was shown that the newly synthesized  
459 MHCII arrives to MIIC in 30-60 min after cell activation (Amigorena et al., 1994).

460

461 The early peripheral MIICs could facilitate the speed of pMHCII presentation but could also tune  
462 the peptide repertoire. In cell fractionation studies, an MHC class II-like protein H2-O has been  
463 reported to concentrate more with the early endosomal fraction as compared to late endosomal  
464 fraction, while the peptide-loading chaperone H2-M shows the opposite trend (Gondré-Lewis et al.,  
465 2001). While H2-O has been characterized with an inhibitory effect on H2-M, it has also been  
466 shown to modulate the repertoire of peptides presented on MHCII with a mechanism still unclear  
467 (Denzin et al., 2005; Karlsson 2005). Different ratios of H2-M and H2-O could thus distinguish the  
468 peptides sent out from the early peripheral MIICs from those originating from the late perinuclear  
469 MIIC.

470

471 Using TEM, we found that the early peripheral antigen vesicles showed highly diverse  
472 morphologies (Fig. 1F, left; Supplementary Fig. 1A). We detected various membrane structures  
473 harboring intraluminal vesicles, consistent with the reports characterizing MIICs with  
474 multivesicular features (Roche and Furuta, 2015; Unanue et al., 2016; van Lith et al., 2001; Xiu et  
475 al., 2011). The shapes ranged from spherical to network-like or multilobular structures. However,  
476 also antigen-containing single-membrane vesicles with round or horse-shoe shapes were detected. It  
477 has been shown in dendritic cells, that intraluminal vesicles are not required for MHCII loading  
478 (Bosch et al., 2013). In the other end of the range, also multilamellar MIIC have been reported  
479 (Unanue et al., 2016). These notions suggest that MIIC function is not bound to certain vesicle  
480 morphology. Based on both the morphological and vesicle marker-based heterogeneity, we propose  
481 that early peripheral antigen vesicles are functional MIIC in transit. Antigen-containing vesicles can  
482 part off and fuse again or migrate as such to the perinuclear region for gradual maturation, but our  
483 data suggests that the vesicles could maintain the MIIC function throughout this pathway.

484

485 **Acknowledgements**



486 We are thankful for Laura Grönfors and Mervi Lindman for technical assistance. Microscopy and  
487 flow cytometry were performed at the Cell Imaging and Cytometry (CIC) at the Turku Bioscience,  
488 Turku, Finland and we thank the personnel, as well as the personnel of Turku Bioimaging, for their  
489 generous help and expertise. Biocenter Finland is acknowledged for providing the imaging  
490 infrastructures in CIC and in the Institute of Biotechnology, Helsinki. We thank Tampere Imaging  
491 Facility for sharing their image analysis resources. Prof. Johanna Ivaska and Dr. Pranshu Sahgal are  
492 acknowledged for their help and generosity regarding reagents and protocols, and Prof. Johanna  
493 Ivaska and Prof. Ari Helenius for constructive discussions. Juan Palacios-Ortega is acknowledged  
494 for help in manuscript formatting.

495

#### 496 **Funding**

497 This work was supported by the Academy of Finland (grant ID: 25700, 296684 and 307313; to  
498 P.K.M.), Sigrid Juselius and Jane and Aatos Erkko foundations (to P.K.M.), Turku doctoral  
499 programme in molecular medicine (TuDMM) (to M.V., S.H-P. and L.O.A.), Turku University  
500 foundation (to M.V., L.O.A.), and Paulo foundation (to E.K.).

501

#### 502 **Competing interests**

503 No competing interests declared.

504

#### 505 **Author contributions**

506 M.V., S.H-P., E.K., E.J., H.V., and P.K.M. conceived and designed the analysis.

507 M.V., S.H-P., E.K., V.P., P.P., and S.F. collected the data.

508 M.V., S.H-P., V.S., E.K., A.V.S., E.J., H.V., A.B., and P.K.M. contributed or performed the data  
509 analysis. A.B. developed the Matlab script and analysed data.

510 L.O.A. generated reagents.

511 M.V., S.H-P., A.V.S., and P.P. visualized the data.

512 P.K.M. and S.H-P. wrote the paper.

513

514

515

516

517

518

519

520

521

522

523

524

525 **Materials and Methods**

526

527 *Table 1. Key resources/reagents table*

|                                                           | Reagents                                                                      | Source/Brand                              | Cat. number                               | Dilution or concentration | Use                            |
|-----------------------------------------------------------|-------------------------------------------------------------------------------|-------------------------------------------|-------------------------------------------|---------------------------|--------------------------------|
| <b>Antigens</b>                                           | Anti-IgM-biotin                                                               | SouthernBiotech                           | 1021-08                                   | 10ug/ml                   | Antigen internalisation (FACS) |
|                                                           | 6nm Gold rat anti-mouse IgM                                                   | Jackson ImmunoResearch                    | 115-195-075                               |                           | EM                             |
|                                                           | Rhodamine Red-X-AffiniPure Donkey anti-mouse IgM                              | JIR                                       | 715-295-140                               | 10ug/ml                   | IF/Live imaging                |
|                                                           | Alexa Fluor 647AffiniPure Donkey anti-mouse IgM                               | JIR                                       | 715-605-140                               | 10ug/ml                   | IF/Live imaging                |
|                                                           | Alexa Fluor 488 AffiniPure F(ab') <sub>2</sub> Fragment Donkey anti-mouse IgM | JIR                                       | 715-546-020                               | 10 µg/ml                  | Live imaging                   |
|                                                           | Donkey anti-mouse IgM AlexaFluor647-biotin                                    | In-house                                  | 715-605-140 + Thermo 21343                | 10ug/ml                   | IF                             |
|                                                           | HEL-biotin                                                                    | In-house                                  | Sigma-aldrich # L6876+ Thermo 21338       |                           | For DQ-Ova probe/FACS          |
| <b>Antibodies</b>                                         | Anti-Rab5                                                                     | CST                                       | 3547                                      | 1:150                     | IF                             |
|                                                           | Anti-Rab6                                                                     | CST                                       | 9625S                                     | 1:200                     | IF                             |
|                                                           | Anti-Rab7                                                                     | Santa Cruz                                | Sc-376362                                 | 1:100                     | IF                             |
|                                                           | Anti-Rab9                                                                     | CST                                       | 5118                                      | 1:150                     | IF                             |
|                                                           | Anti-Rab11                                                                    | CST                                       | 5589                                      | 1:200                     | IF                             |
|                                                           | Anti-EEA1                                                                     | Santa Cruz                                | Sc-6415                                   | 1:50                      | IF                             |
|                                                           | Anti-LAMP1                                                                    | DSHB                                      | 1D4B                                      | 1:75                      | IF                             |
|                                                           | Anti-CathepsinS                                                               | LSbio                                     | B2550                                     | 1:50                      | IF                             |
|                                                           | Anti-CathepsinS                                                               | Santa Cruz                                | sc-271619                                 | 1:50                      | IF                             |
|                                                           | Anti-MHCII                                                                    | Santa Cruz                                | Sc-59322                                  | 1:50                      | IF                             |
|                                                           | Anti-MHCII-AF488                                                              | In-house                                  | Sc-59322 + Thermo A20000                  | 1:50                      | IF/Live imaging                |
|                                                           | Anti-PCMI-AF647                                                               | Santa Cruz                                | Sc-398365 AF647                           | 1:200                     | IF                             |
|                                                           | Donkey-anti-rabbit IgG (H+L) AlexaFluor 488/555/647                           | Thermo                                    | A21206, A31572, A31573                    | 1:500                     | IF                             |
|                                                           | Donkey anti-goat IgG (H+L) AlexaFluor 488/555                                 | Thermo                                    | A11055, A21432                            | 1:500                     | IF                             |
|                                                           | Mouse anti-rat IgG Fcy Fragment Specific AlexaFluor 488/RRx/647               | JIR                                       | 212-545-104<br>212-295-104<br>212-605-104 | 1:500                     | IF                             |
| Goat-anti-mouse IgG Fcy subclass 1 AlexaFluor 488/RRx/647 | JIR                                                                           | 115-545-205<br>115-295-205<br>115-605-205 | 1:500                                     | IF                        |                                |

|              |                      |          |                                                                                |         |              |
|--------------|----------------------|----------|--------------------------------------------------------------------------------|---------|--------------|
| <b>Other</b> | LysoTracker Deep Red | Thermo   | L12492                                                                         | 125 nM  | Live imaging |
|              | DQ-OVA-biotin        | In-house | Thermo D12053<br>+EZ-Link<br>Maleimide-PEG2-<br>biotin<br>(Thermo<br>21901BID) | 1:10    | FACS         |
|              | Fibronectin          | Sigma    | F4759-2MG                                                                      | 4 µg/ml | IF           |

528

529 *Cells and mice*

530 A20 mouse lymphoma cells stably expressing a hen egg lysozyme (HEL)–specific IgM BCR (D1.3)  
531 (Williams et al, 1994) were maintained in complete RPMI (cRPMI; RPMI 1640 with 2.05 mM L-  
532 glutamine supplemented with 10% fetal calf serum (FCS), 50 µM β-mercaptoethanol, 4 mM L-  
533 glutamine, 10 mM HEPES and 100 U/ml Penicillin/Streptomycin). Primary splenic B cells were  
534 isolated from MD4 mice (C57BL/6-Tg(IghelMD4)4Ccg/J, The Jackson Laboratory) using a  
535 negative selection kit (StemCell Technologies, # 19854).

536

537 *Transfection*

538 A20 D1.3 cells were transfected as previously described (Sustar et al., 2018). Briefly, 2 million  
539 cells were resuspended in 180ul of 2S transfection buffer (5 mM KCl, 15 mM MgCl<sub>2</sub>, 15 mM  
540 HEPES, 50 mM Sodium Succinate, 180 mM Na<sub>2</sub>HPO<sub>4</sub>/ NaH<sub>2</sub>PO<sub>4</sub> pH 7.2) containing 2 µg of  
541 plasmid and electroporated using AMAXA electroporation machine (program X-005, Biosystem) in  
542 0.2 cm gap electroporation cuvettes. Cells were then transferred to 2ml of cRPMI to recover  
543 overnight. Rab5a-GFP plasmid was a kind gift from Prof. Johanna Ivaska.

544

545 *B cell activation and visualization of antigen vesicles by immunofluorescence*

546 A20 D1.3 or isolated primary B cells were activated with 10µg/ml of Alexa Fluor-647 or  
547 Rhodamine Red-X (RRx) anti-mouse IgM (α-IgM) (Jackson ImmunoResearch), unless indicated  
548 otherwise. Cells were labelled with fluorescently-labelled α -IgM for 10 min on ice, washed with  
549 PBS to remove excess unbound antigen and resuspend in Imaging Buffer (PBS, 10% FCS). When  
550 indicated, cells were also labelled with anti-MHCII-Alexa Fluor 488 on ice. After washing, cells  
551 were activated for different timepoints in an incubator (5% CO<sub>2</sub>, 37°C) in a 12-wells PTFE  
552 diagnostic slide (Thermo, #10028210), coated with fibronectin, and fixed with 4% PFA 10min at  
553 RT. Samples were blocked and permeabilized with blocking buffer (5% horse or donkey serum,  
554 0.3% Triton X100 in PBS) for 20min at RT. After blocking, samples were stained with primary  
555 antibodies for 1h at RT or 4°C O/N in staining buffer (1% BSA, 0.3% Triton X100 in PBS),

556 followed by washes with PBS and incubation with the secondary antibodies 30min at RT in PBS.  
557 Samples were mounted using FluoroMount-G containing DAPI (Thermo #00495952).

558

#### 559 *Visualization of antigen vesicles by live imaging*

560 A20 D1.3 cells (1 million/ml) were labelled with 125 nM LysoTracker Deep Red (Thermo #  
561 L12492) for 1 hour in an incubator (5% CO<sub>2</sub>, 37°C), washed with PBS and resuspended in cRPMI.  
562 Cells were then labelled with 10µg/ml of donkey anti-mouse IgM-AF488 on ice for 10 min and  
563 washed with cold PBS. For surface-MHCII internalisation experiments, cells were stained on ice  
564 with anti-MHCII-AF488 and 10µl/ml donkey-anti-mouse IgM-RRx for 5min and washed with cold  
565 PBS. Cells were resuspended in cold Imaging Buffer and seeded on 4-well MatTek dishes on ice.  
566 After seeding, cells were activated at 37 °C inside the environmental chamber of the microscope  
567 and image immediately.

568

#### 569 *Image acquisition and processing, spinning disk confocal microscopy*

570 Images were acquired using a 3i CSU-W1 spinning disk equipped with 405, 488, 561 and 640 nm  
571 laser lines and 510-540, 580-654 and 672-712 nm filters and 63x Zeiss Plan-Apochromat objective.  
572 Hamamatsu sCMOS Orca Flash4 v2 C11440-22CU (2048 x 2048 pixels, 1x1 binning) was used to  
573 image fixed samples unless otherwise indicated, and Photometrics Evolve 10 MHz Back  
574 Illuminated EMCCD (512 x 512 pixels, 1x1 binning) camera was used to image live samples.

575 All SDCM images were deconvolved with Huygens Essential version 16.10 (Scientific Volume  
576 Imaging, The Netherlands, <http://svi.nl>), using the CMLE algorithm, with Signal to Noise Ratio of  
577 20 and 40 iterations. For SRRF, 20-50 images were acquired from one single plane using timelapse  
578 mode and processed in Fiji ImageJ using the SRRF module.

579

#### 580 *Colocalisation analysis*

581 Colocalisation on Spinning Disk Confocal Microscope images were analysed with Huygens  
582 Essential version 16.10 (Scientific Volume Imaging, The Netherlands, <http://svi.nl>), using  
583 optimized, automatic thresholding. Colocalisation on SRRF images was performed on ImageJ using  
584 Colocalisation Threshold tool. Graphs and statistics were prepared on GraphPad Prism (GraphPad  
585 Software, La Jolla California USA).

586

#### 587 *Analysis of antigen clustering*

588 Cluster analysis of the deconvolved data was done by batch processing in Matlab R2017a (The  
589 MathWorks Inc.). Binary masks were created from full volumes containing one cell using the

590 method by Otsu. Objects were then segmented in 3D using the regionprops function. Only objects  
591 inside a circular mask were kept in order to exclude clusters from adjacent cells, for simplicity this  
592 was done in 2D by manually overlaying the image with a circle. The MTOC channel was  
593 segmented in the same way and the cluster with the highest intensity value was identified as  
594 MTOC. The distances of each cluster to the MTOC was calculated from the centroid positions in  
595 3D. Graphs and statistics were prepared on GraphPad Prism.

596

#### 597 *Structured illumination microscopy (SIM)*

598 The samples were prepared as above in “*B cell activation and visualization of antigen vesicles by*  
599 *immunofluorescence*” on fibronectin-coated MatTek dishes and mounted in Vectashield (Vector  
600 Laboratories, US) mounting medium. 3D structured illumination (SIM) Imaging was performed  
601 with GE Healthcare, DeltaVision OMX SR V4 with 60x/1.42 SIM Olympus Plan Apo N objective,  
602 front Illuminated sCMOS cameras, 488, 568 and 640 nm solid-state lasers by optical sectioning of  
603 0.125  $\mu\text{m}$ . The SIM reconstruction was performed with OMX Acquisition software version 3.70.  
604 (GE Healthcare, UK).

605

#### 606 *Antigen internalisation for flow cytometry*

607 A20 D1.3 cells were stained on ice for 10 min with anti-IgM-biotin (Southern Biotech) or HEL-  
608 biotin and washed with PBS. Cells were incubated at 37C and 5% CO<sub>2</sub> at different timepoints. For  
609 time 0 the samples were kept on ice all the time After incubation, cells were kept on ice and stained  
610 with streptavidin-633 (LifeTechnologies #S-21375) for 20min, washed and analysed. BD LSR  
611 Fortessa analyser equipped with four lasers (405, 488, 561 and 640nm) was used.

612

#### 613 *Antigen internalisation, immunofluorescence*

614 A20 D1.3 cells were stained on ice for 10 min with biotinylated anti-IgM-Alexa Fluor F647-  
615 (labelled in-house) and washed with PBS. Cells were resuspended in Imaging Buffer (PBS, 10%  
616 FCS) and activated for different timepoints in an incubator (5% CO<sub>2</sub>, 37°C) on fibronectin-coated  
617 12-well microscope slide. After activation, slides were kept on ice to stop internalisation and  
618 stained with streptavidin-Alexa Fluor 488 (#S11223) for 10 min. Cells were washed with PBS and  
619 fixed with 4% PFA 10 min at RT. Samples were mounted using FluoroMount-G (Thermo 00-4958-  
620 02).

621

#### 622 *DQ-Ova proteolysis reporter*

623 DQ Ovalbumin (Thermo Fisher Scientific D12053) was biotinylated in-house with EZ-Link  
624 Maleimide-PEG2-biotin (Thermo 21901BID). HEL from (#L6876 Sigma) was biotinylated using  
625 EZ-Link™ Sulfo-NHS-LC-LC-Biotin (Thermo 21338). A20 D1.3 cells were first incubated with  
626 biotin-HEL or biotinylated anti-IgM (Southern Biotech) for 10 min on ice. After washing with PBS,  
627 cells were incubated for 5min on ice with unlabelled streptavidin for IF samples or Alexa Fluor  
628 633-labelled streptavidin for flow cytometry samples, wash with PBS, and incubated 5min on ice  
629 with biotinylated-DQ-Ova. After 3 washes with PBS, cells were activated in an incubator (5% CO<sub>2</sub>,  
630 37°C) to allow internalisation of the probe-linked antigen. After the activation, cells were placed on  
631 ice and analysed by flow cytometry immediately. For immunofluorescence samples, cells were  
632 activated on 12-well slides coated with fibronectin in the incubator, fixed with 4% PFA after  
633 activation, and stained as previously described. DQ-Ova was excited with 488 nm laser and  
634 measured with filters identical to Alexa Fluor 488 or GFP.

635

#### 636 *Transmission electron microscopy*

637 A20 D1.3 cells were activated with a mixture of 6 nm colloidal-gold conjugated goat anti-Mouse  
638 IgM (Jackson ImmunoResearch, 115-195-075; 1:650 dilution) and 20 µg/ml Alexa Fluor 647  
639 labelled donkey anti-mouse IgM F(ab')<sub>2</sub> fragments (Jackson ImmunoResearch, 715-606-020) in  
640 imaging buffer (0.5mM CaCl<sub>2</sub>, 0.2mM MgCl<sub>2</sub>, 5.5mM D-Glucose, 10% FBS in PBS) and placed on  
641 fibronectin (4 µg/ml) coated glass coverslips (thickness #1) for 15 or 75 min. The cells were fixed  
642 with 2 % Glutaraldehyde (EM-grade, Sigma G7651) in 0.1 M Na-Cacodylate buffer, pH 7.4, for 30  
643 min at room temperature, and then washed twice for 3 min with 0.1 M Na-Cacodylate buffer, pH  
644 7.4. The samples were processed for TEM as described in Seemann et al., 2000. 60-nm-thick  
645 sections parallel to the cover slip were cut using a Leica EM Ultracut UC7 ultramicrotome (Leica  
646 Mikrosysteme GmbH, Austria). The electron micrographs post-stained with uranyl acetate and lead  
647 citrate, and imaged with Jeol JEM 1400 transmission electron microscope (Jeol Ltd., Tokyo, Japan)  
648 equipped with a bottom mounted CCD-camera (Orius SC 1000B, Gatan Inc., Pleasanton, CA) and  
649 Jeol JEM-1400 Plus equipped with OSIS Quemesa bottom-mounted CCD-Camera (EMSYS,  
650 Germany), both operating at 80 kV.

651

#### 652 *Statistical analysis*

653 Statistical significances were calculated using unpaired Student's *t*-test or two-way Anova.  
654 Statistical values are denoted as: \**P*<0.05, \*\**P*<0.01, \*\*\**P*<0.001, \*\*\*\**P*<0.0001.

655

#### 656 **References**

657

658 **Adler, L. N., Jiang, W., Bhamidipati, K., Millican, M., Macaubas, C., Hung, S. chen and Mellins, E. D.** (2017). The other  
659 function: Class II-restricted antigen presentation by B cells. *Front. Immunol.*

660 **Aluvihare, V. R., Khamlichi, A. A., Williams, G. T., Adorini, L. and Neuberger, M. S.** (1997). Acceleration of intracellular  
661 targeting of antigen by the B-cell antigen receptor: importance depends on the nature of the antigen-antibody interaction.  
662 *EMBO J.* **16**, 3553–62.

663 **Amigorena, S., Drake, J. R., Webster, P. and Mellman, I.** (1994). Transient accumulation of new class II MHC molecules in a  
664 novel endocytic compartment in B lymphocytes. *Nature* **369**, 113–20.

665 **Barroso, M., Tucker, H., Drake, L., Nichol, K. and Drake, J. R.** (2015). Antigen-B Cell Receptor Complexes Associate with  
666 Intracellular major histocompatibility complex (MHC) Class II Molecules. *J. Biol. Chem.* **290**, 27101–12.

667 **Bosch, B., Heipertz, E. L., Drake, J. R. and Roche, P. A.** (2013). Major histocompatibility complex (MHC) class II-peptide  
668 complexes arrive at the plasma membrane in cholesterol-rich microclusters. *J. Biol. Chem.*

669 **Castellino, F. and Germain, R. N.** (1995). Extensive trafficking of MHC class II-invariant chain complexes in the endocytic  
670 pathway and appearance of peptide-loaded class II in multiple compartments. *Immunity* **2**, 73–88.

671 **Chen, K., Healy, M. D. and Collins, B. M.** (2019). Towards a molecular understanding of endosomal trafficking by Retromer and  
672 Retriever. *Traffic.*

673 **Clotworthy, M. and Traynor, D.** (2006). On the effects of cycloheximide on cell motility and polarisation in Dictyostelium  
674 discoideum. *BMC Cell Biol.* **7**, 5.

675 **Darvishi, E. and Woldemichael, G. M.** (2016). Cycloheximide Inhibits Actin Cytoskeletal Dynamics by Suppressing Signaling via  
676 RhoA. *J. Cell. Biochem.*

677 **Davidson, H. W., West, M. A. and Watts, C.** (1990). Endocytosis, intracellular trafficking, and processing of membrane IgG and  
678 monovalent antigen/membrane IgG complexes in B lymphocytes. *J. Immunol.* **144**, 4101–9.

679 **Delevoeye, C., Marks, M. S. and Raposo, G.** (2019). Lysosome-related organelles as functional adaptations of the endolysosomal  
680 system. *Curr. Opin. Cell Biol.* **59**, 147–158.

681 **Denzin, L. K., Fallas, J. L., Prendes, M. and Yi, W.** (2005). Right place, right time, right peptide: DO keeps DM focused.  
682 *Immunol. Rev.*

683 **Gondré-Lewis, T. a, Moquin, a E. and Drake, J. R.** (2001). Prolonged antigen persistence within nonterminal late endocytic  
684 compartments of antigen-specific B lymphocytes. *J. Immunol.* **166**, 6657–64.

685 **Gustafsson, N., Culley, S., Ashdown, G., Owen, D. M., Pereira, P. M. and Henriques, R.** (2016). Fast live-cell conventional  
686 fluorophore nanoscopy with ImageJ through super-resolution radial fluctuations. *Nat. Commun.*

687 **Homma, Y., Kinoshita, R., Kuchitsu, Y., Wawro, P. S., Marubashi, S., Oguchi, M. E., Ishida, M., Fujita, N. and Fukuda, M.**  
688 (2019). Comprehensive knockout analysis of the Rab family GTPases in epithelial cells. *J. Cell Biol.*

689 **Huotari, J. and Helenius, A.** (2011). Endosome maturation. *EMBO J.* **30**, 3481–500.

690 **Hutagalung, A. H. and Novick, P. J.** (2011). Role of Rab GTPases in membrane traffic and cell physiology. *Physiol. Rev.* **91**, 119–  
691 49.

692 **Karlsson, L.** (2005). DM and DO shape the repertoire of peptide-MHC-class-II complexes. *Curr. Opin. Immunol.*

693 **Kirkham, M., Fujita, A., Chadda, R., Nixon, S. J., Kurzchalia, T. V., Sharma, D. K., Pagano, R. E., Hancock, J. F., Mayor, S.  
694 and Parton, R. G.** (2005). Ultrastructural identification of uncoated caveolin-independent early endocytic vehicles. *J. Cell  
695 Biol.* **168**, 465–476.

696 **Langemeyer, L., Bastos, R. N., Cai, Y., Itzen, A., Reinisch, K. M. and Barr, F. A.** (2014). Diversity and plasticity in Rab GTPase  
697 nucleotide release mechanism has consequences for Rab activation and inactivation. *Elife.*

698 **Lankar, D., Vincent-Schneider, H., Briken, V., Yokozeki, T., Raposo, G. and Bonnerot, C.** (2002). Dynamics of major  
699 histocompatibility complex class II compartments during B cell receptor-mediated cell activation. *J. Exp. Med.* **195**, 461–72.

700 **Manders, E. M.M. Verbeek, F. J. Aten, J. A.** (1993). Measurement of co-localization of objects in dual-colour confocal images. *J.*

- 701 *Microsc.* **169**, 375–382.
- 702 **Martinez-Martin, N., Maldonado, P., Gasparri, F., Frederico, B., Aggarwal, S., Gaya, M., Tsui, C., Burbage, M., Keppler,**  
703 **S. J., Montaner, B., et al.** (2017). A switch from canonical to noncanonical autophagy shapes B cell responses. *Science* **355**,  
704 641–647.
- 705 **Mellins, E. D. and Stern, L. J.** (2014). HLA-DM and HLA-DO, key regulators of MHC-II processing and presentation. *Curr. Opin.*  
706 *Immunol.* **26**, 115–22.
- 707 **Oksvold, M. P., Pedersen, N. M., Forfang, L. and Smeland, E. B.** (2012). Effect of cycloheximide on epidermal growth factor  
708 receptor trafficking and signaling. *FEBS Lett.*
- 709 **Paul, P., van den Hoorn, T., Jongma, M. L. M., Bakker, M. J., Hengeveld, R., Janssen, L., Cresswell, P., Egan, D. a, van**  
710 **Ham, M., Ten Brinke, A., et al.** (2011). A Genome-wide multidimensional RNAi screen reveals pathways controlling MHC  
711 class II antigen presentation. *Cell* **145**, 268–83.
- 712 **Rink, J., Ghigo, E., Kalaidzidis, Y. and Zerial, M.** (2005). Rab conversion as a mechanism of progression from early to late  
713 endosomes. *Cell* **122**, 735–49.
- 714 **Roche, P. A. and Furuta, K.** (2015). The ins and outs of MHC class II-mediated antigen processing and presentation. *Nat. Rev.*  
715 *Immunol.* **15**, 203–16.
- 716 **Seemann, J., Jokitalo, E. J. and Warren, G.** (2000). The Role of the Tethering Proteins p115 and GM130 in Transport through the  
717 Golgi Apparatus In Vivo. *Mol. Biol. Cell.*
- 718 **Siemasko, K., Eisfelder, B. J., Williamson, E., Kabak, S. and Clark, M. R.** (1998). Cutting edge: signals from the B lymphocyte  
719 antigen receptor regulate MHC class II containing late endosomes. *J. Immunol.* **160**, 5203–8.
- 720 **Sustar, V., Vainio, M., & Mattila, P. K.** Visualization and Quantitative Analysis of the Actin Cytoskeleton Upon B Cell  
721 Activation. *B Cell Receptor Signaling*, 243.
- 722 **Tsui, C., Martinez-Martin, N., Gaya, M., Maldonado, P., Llorian, M., Legrave, N. M., Rossi, M., MacRae, J. L., Cameron, A.**  
723 **J., Parker, P. J., et al.** (2018). Protein Kinase C- $\beta$  Dictates B Cell Fate by Regulating Mitochondrial Remodeling, Metabolic  
724 Reprogramming, and Heme Biosynthesis. *Immunity* **48**, 1144-1159.e5.
- 725 **Unanue, E. R., Turk, V. and Neefjes, J.** (2016). Variations in MHC Class II Antigen Processing and Presentation in Health and  
726 Disease. *Annu. Rev. Immunol.*
- 727 **van Lith, M., van Ham, M., Griekspoor, A., Tjin, E., Verwoerd, D., Calafat, J., Janssen, H., Reits, E., Pastoors, L. and**  
728 **Neefjes, J.** (2001). Regulation of MHC Class II Antigen Presentation by Sorting of Recycling HLA-DM/DO and Class II  
729 within the Multivesicular Body. *J. Immunol.* **167**, 884–892.
- 730 **Vascotto, F., Lankar, D., Faure-André, G., Vargas, P., Diaz, J., Le Roux, D., Yuseff, M.-I., Sibarita, J.-B., Boes, M., Raposo,**  
731 **G., et al.** (2007a). The actin-based motor protein myosin II regulates MHC class II trafficking and BCR-driven antigen  
732 presentation. *J. Cell Biol.* **176**, 1007–1019.
- 733 **Vascotto, F., Le Roux, D., Lankar, D., Faure-André, G., Vargas, P., Guernonprez, P. and Lennon-Duménil, A.-M.** (2007b).  
734 Antigen presentation by B lymphocytes: how receptor signaling directs membrane trafficking. *Curr. Opin. Immunol.* **19**, 93–8.
- 735 **Vonderheit, A. and Helenius, A.** (2005). Rab7 associates with early endosomes to mediate sorting and transport of Semliki forest  
736 virus to late endosomes. *PLoS Biol.*
- 737 **Wandinger-Ness, A. and Zerial, M.** (2014). Rab proteins and the compartmentalization of the endosomal system. *Cold Spring*  
738 *Harb. Perspect. Biol.* **6**, a022616.
- 739 **West, M. A., Lucocq, J. M. and Watts, C.** (1994). Antigen processing and class II MHC peptide-loading compartments in human  
740 B-lymphoblastoid cells. *Nature* **369**, 147–51.
- 741 **Whitmire, J. K., Asano, M. S., Kaech, S. M., Sarkar, S., Hannum, L. G., Shlomchik, M. J. and Ahmed, R.** (2009). Requirement  
742 of B Cells for Generating CD4+ T Cell Memory. *J. Immunol.*
- 743 **Xiu, F., Côté, M.-H., Bourgeois-Daigneault, M.-C., Brunet, A., Gauvreau, M.-É., Shaw, A. and Thibodeau, J.** (2011). Cutting  
744 edge: HLA-DO impairs the incorporation of HLA-DM into exosomes. *J. Immunol.* **187**, 1547–51.
- 745 **Yonemura, Y., Li, X., Müller, K., Krämer, A., Atigbire, P., Mentrup, T., Feuerhake, T., Kroll, T., Shomron, O., Nohl, R., et**



746            **al.** (2016). Inhibition of cargo export at ER exit sites and the trans-Golgi network by the secretion inhibitor FLI-06. *J. Cell Sci.*  
747    **Yuseff, M.-L., Reversat, A., Lankar, D., Diaz, J., Fanget, I., Pierobon, P., Randrian, V., Larochette, N., Vascotto, F.,**  
748            **Desdouets, C., et al.** (2011). Polarized secretion of lysosomes at the B cell synapse couples antigen extraction to processing  
749            and presentation. *Immunity* **35**, 361–74.  
750  
751

## Figure 1

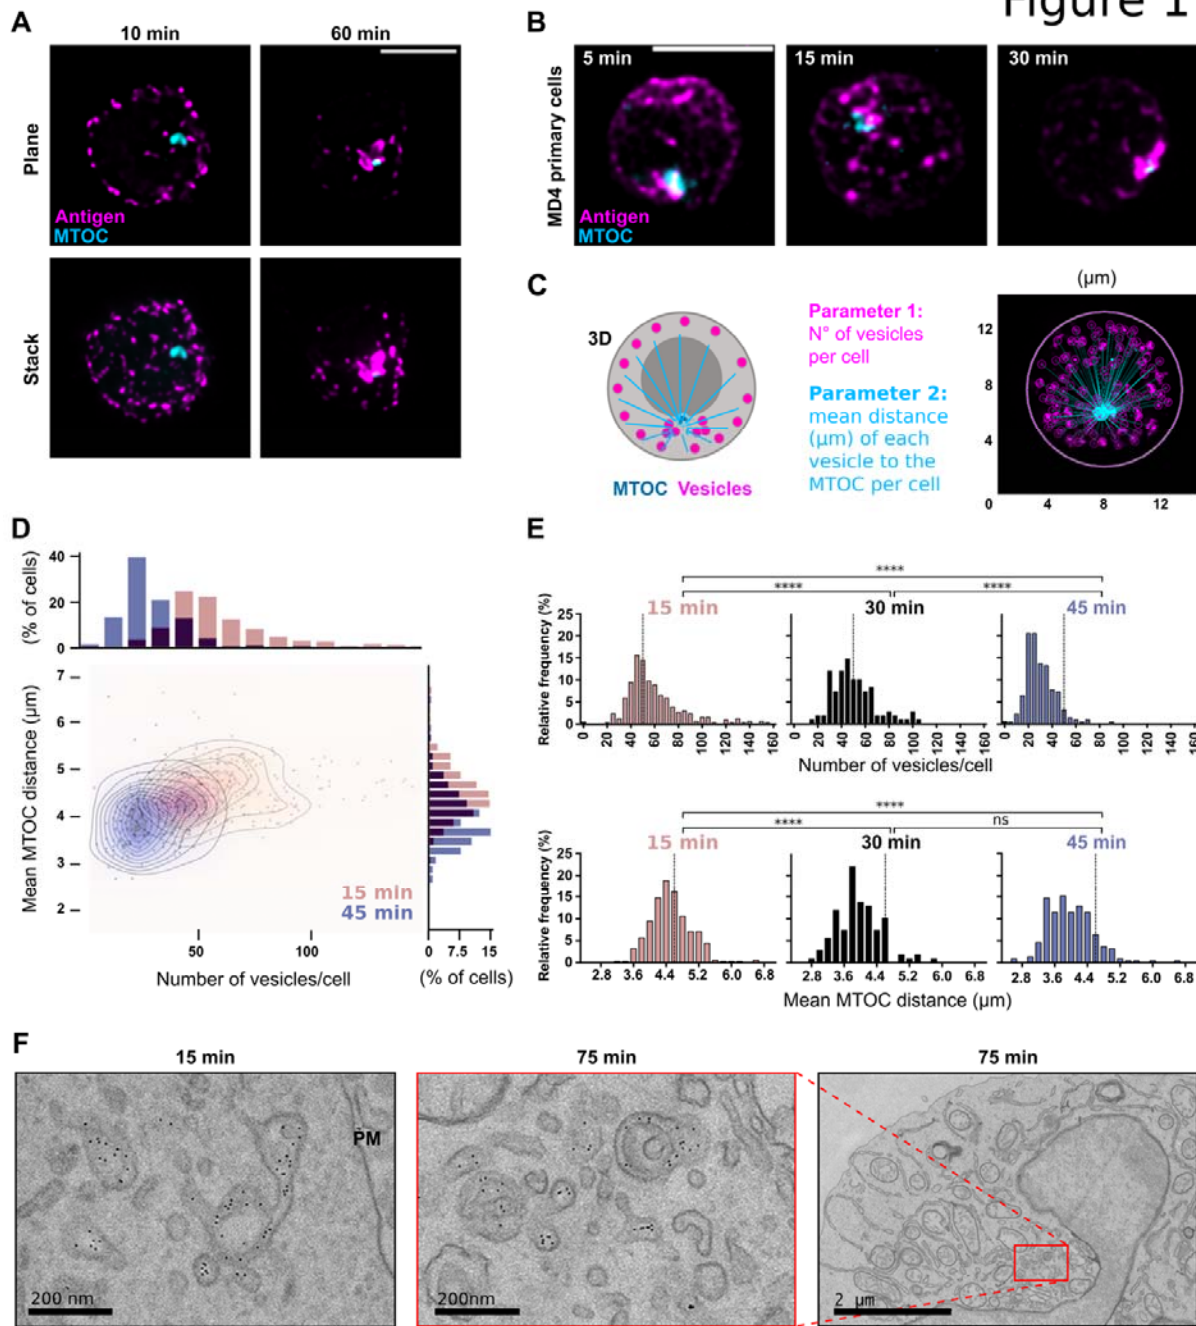

752

753

754

755

756

757

758

759

760

761

762

763

764

765

766

767

768

**Figure 1. Antigen vesicles traffic to a perinuclear compartment in the vicinity of the MTOC.** **A** A20 D1.3 B cells were activated with Alexa Fluor-labelled anti-IgM antibodies (AF- $\alpha$ IgM) (antigen, magenta) for 10 and 60 min and stained with antibodies against PCM-1 (MTOC, cyan). 3D SDCM was performed and the images were deconvolved using Huygens software. Upper panel shows single confocal planes and the lower panel shows z-projections of the whole stacks of representative cells. Scale bar 5  $\mu\text{m}$ . **B** Primary MD4 B cells were activated with AF- $\alpha$ IgM (antigen, magenta) for different timepoints and stained with antibodies against PCM-1 (MTOC, cyan). 3D SDCM was performed and the images were deconvolved using Huygens software. Z-projections of the whole stacks from representative cells are shown. Scale bar 5  $\mu\text{m}$ . **C** A schematic of the vesicle quantification using a MatLab-based script. Number of antigen vesicles in one cell (in magenta) and mean distance from all the vesicles to the MTOC (in cyan) is measured in a 3D image. Left, schematic representation; right, example image from the script. **D** Quantification of data in **A**. 3D images from cells activated for 15 (pink) and 45 (blue) min were analysed as in **C**. Upper axis shows mean number of vesicles per cell and right axis shows mean distance of the vesicles to MTOC per cell. The two timepoints were compared using a density plot. **E** Comparison of samples prepared as in **A**, activated for 15, 30 and 45 min and analysed as in **C** and **D**. Dashed line represent the median of the cell population in 15 min. Statistical analysis was done using Student's t-test. Timepoints 15 and 45 min contain 2 experiments,  $n > 200$  cells; and timepoint of 30 min is derived from one experiment,  $n > 100$  cells. **F** A20 D1.3 cells were activated with  $\alpha$ IgM conjugated with 6nm colloidal gold particles mixed with AF647- $\alpha$ IgM, for 15 and 75 min and imaged using Transmission Electron Microscopy. PM – Plasma membrane. Scale bars 200 nm and 2  $\mu\text{m}$ .

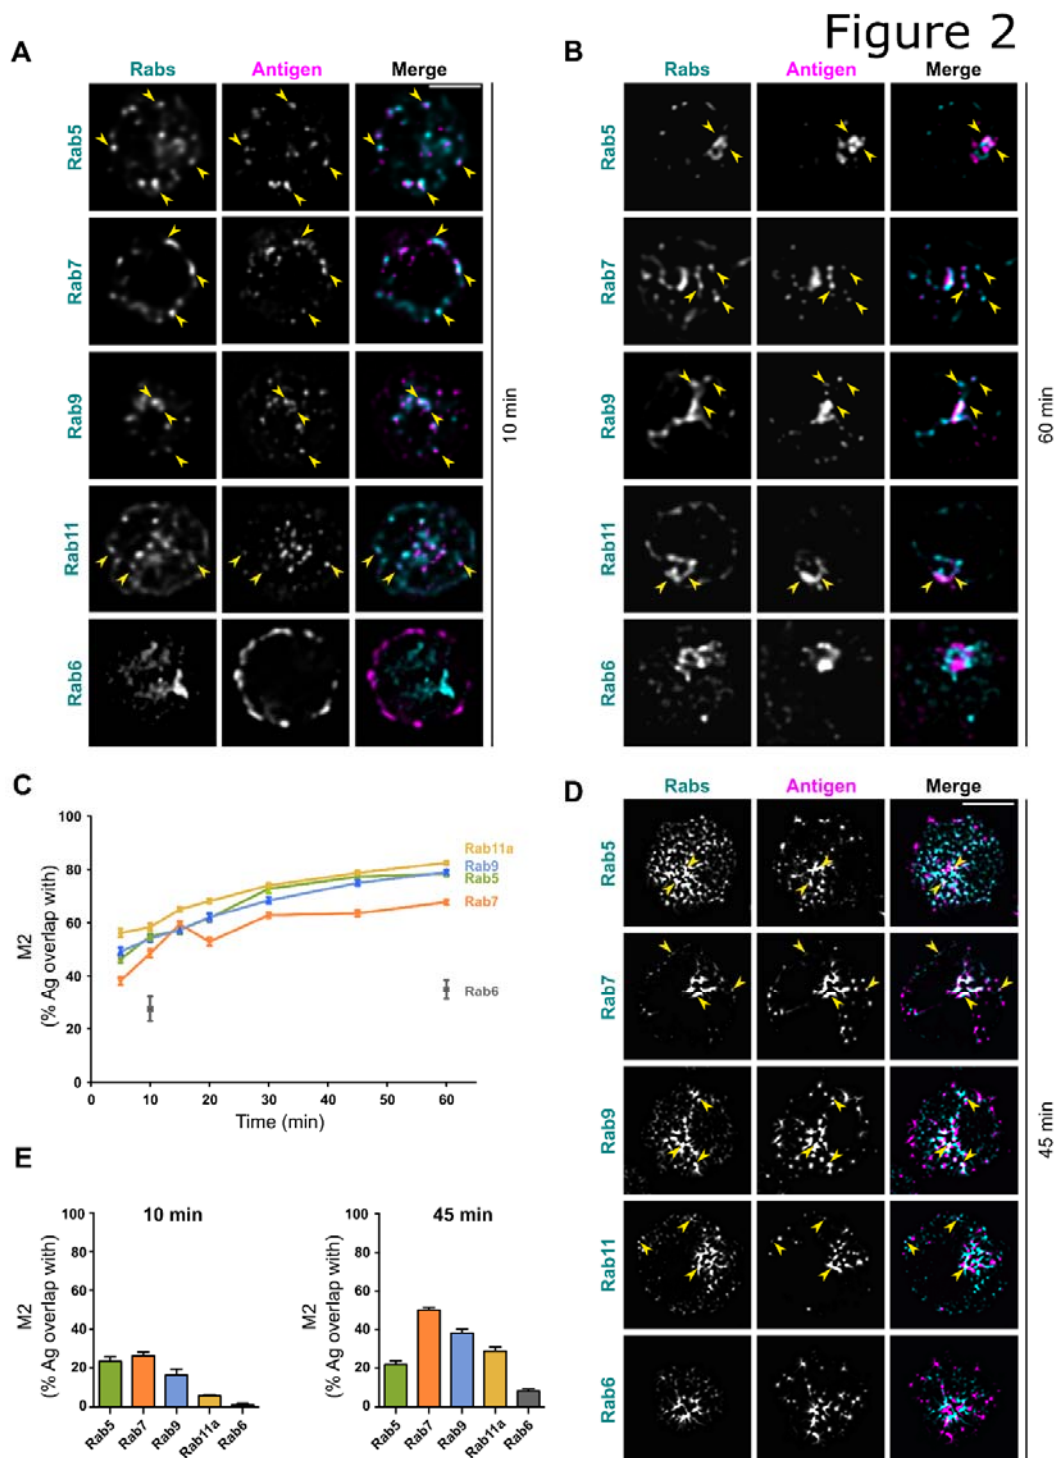

769  
770  
771  
772  
773  
774  
775  
776  
777  
778  
779  
780  
781  
782

**Figure 2. Colocalisation analysis of antigen with different Rab-proteins.** A-B SDCM imaging of A20 D1.3 cells activated with AF647- $\alpha$ IgM (antigen, magenta) for 10 min (A) or 60 min (B) and immunostained for different Rab-proteins: Rab5, Rab7, Rab9, Rab11 and Rab6 (cyan). Images were deconvolved with Huygens software. Single confocal planes from representative cells are shown and examples of colocalising vesicles are pointed to with yellow arrow-heads. See Supplementary Figure 3A-B for z-projections. Scale bar 5  $\mu$ m. C Quantification of the data in A and B with additional timepoints. Antigen colocalisation with different Rab-proteins was measured from deconvolved images by analysing Manders' overlap coefficients using Huygens. Data from three independent experiments (>80 cells/timepoint). Results are shown as mean  $\pm$ SEM. D Samples were prepared with cells activated for 10 or 45 min as in A-B and imaged with iterative imaging of a single plane with SDCM (20-25 frames/plane) and post-processed to obtain SRRF super-resolution image (antigen, magenta; Rabs, cyan). Examples of colocalising vesicles are pointed to with yellow arrowheads. Scale bar 5  $\mu$ m. E Quantification of the SRRF data in D by analysing Manders' overlap coefficients with ImageJ. Data in 45 min timepoint is from two independent experiments and 10 min from one experiment (>25 cells / timepoint). Results are shown as mean  $\pm$ SEM.

## Figure 3

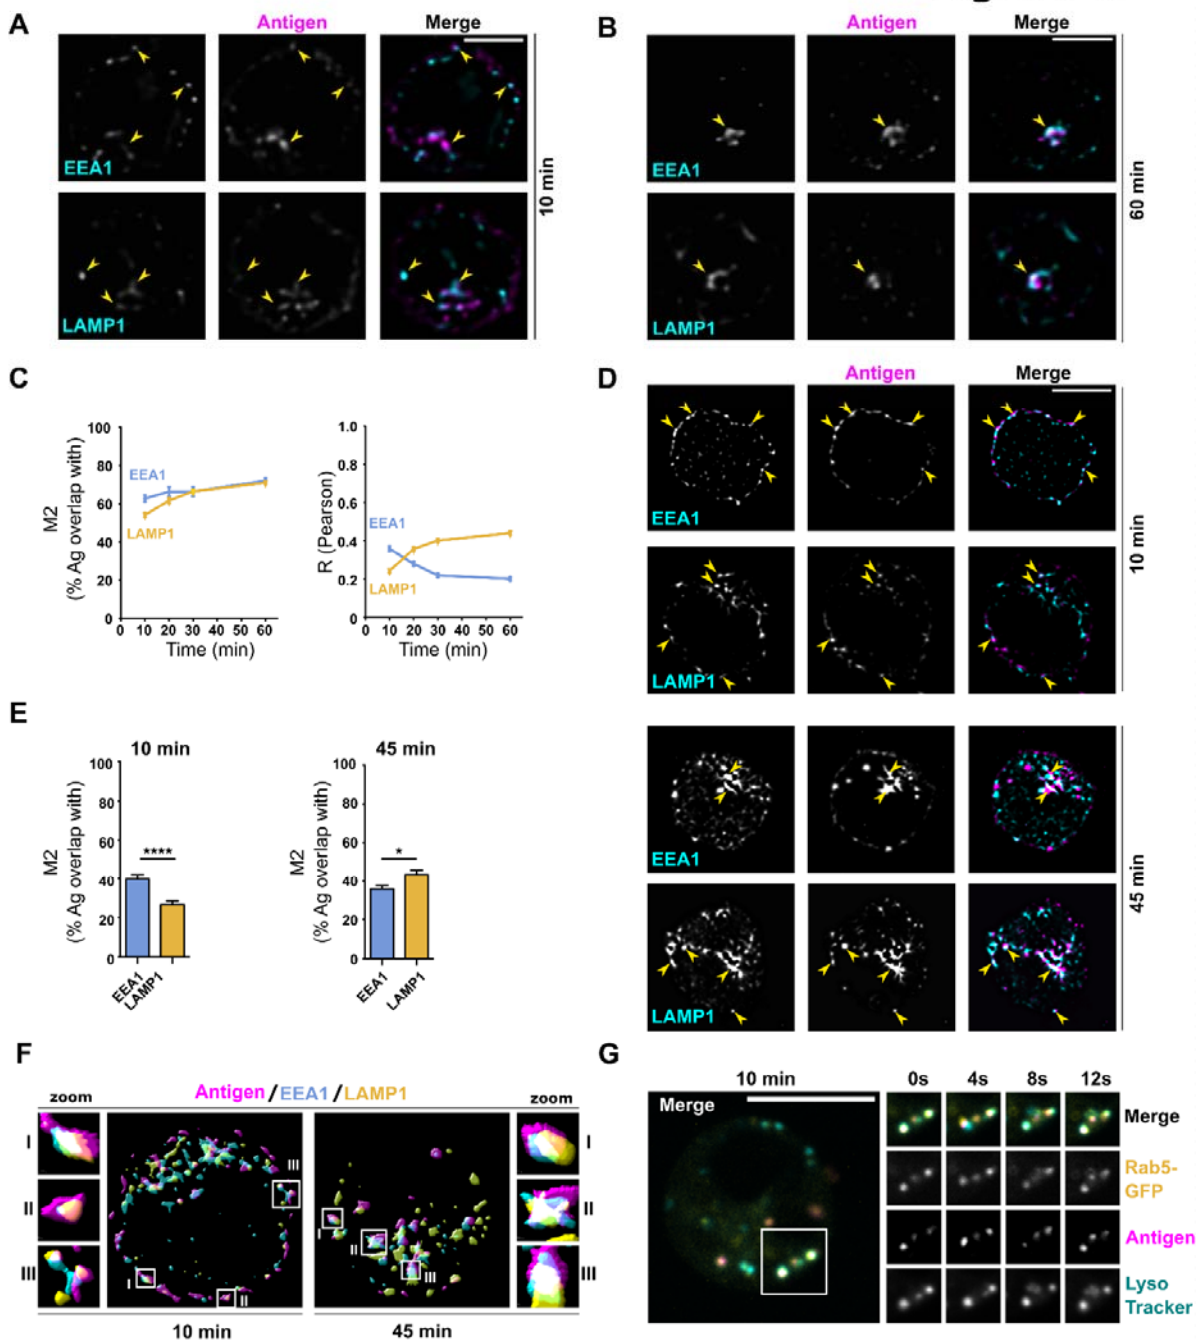

783 **Figure 3. Antigen localises with both EEA1 and LAMP1 while trafficking to the perinuclear region.** A-B SDCM imaging of  
 784 A20 D1.3 cells activated with AF647- $\alpha$ IgM (antigen, magenta) for 10 min (A) or 60 min (B) and immunostained for EEA1 or  
 785 LAMP1 (cyan). Images were deconvolved with Huygens software. Single confocal planes from representative cells are shown and  
 786 examples of colocalising vesicles are pointed to with yellow arrow-heads. See Supplementary Figure 3C-D for z-projections. Scale  
 787 bar 5  $\mu$ m. C Quantification of the data in A and B with additional timepoints. Antigen colocalisation with EEA1 and LAMP1 was  
 788 measured from deconvolved images by analysing Manders' overlap coefficients and Pearson's correlation coefficients using  
 789 Huygens. Data from two independent experiments with >40 cells / timepoint. Results are shown as mean  $\pm$ SEM. D Samples were  
 790 prepared with cells activated for 10 or 45 min as in A-B and imaged with iterative imaging of a single plane with SDCM (20-25  
 791 frames/plane) and post-processed to obtain SRRF super-resolution image (antigen, magenta; EEA/LAMP1, cyan). Examples of  
 792 colocalising vesicles are pointed to with yellow arrowheads. Scale bar 5  $\mu$ m. E Quantification of the SRRF data in D by analysing  
 793 Manders' overlap coefficients with ImageJ. Data from three independent experiments (>30 cells/timepoint). Results are shown as  
 794 mean  $\pm$ SEM. F Surface reconstruction using Huygens rendering tool of SRRF images from samples prepared as in D (antigen,  
 795 magenta) and immunostained for EEA1 (cyan) and LAMP1 (yellow). Three selected example vesicles are highlighted by zoom-in. G  
 796 A20 D1.3 cells were transfected with GFP-Rab5 (yellow), loaded with LysoTracker (LT; cyan) and activated with RRx- $\alpha$ IgM  
 797 (antigen, magenta). Live-imaging was performed with SDCM (ORCA camera) on a single plane. On the left, a merge image of a  
 798 representative cell after 10 min of activation is shown. On the right, the region in the white square is followed in split channels as a  
 799 timelapse for 12 sec, starting 10 min after activation. See supplementary Movie 1.

## Figure 4

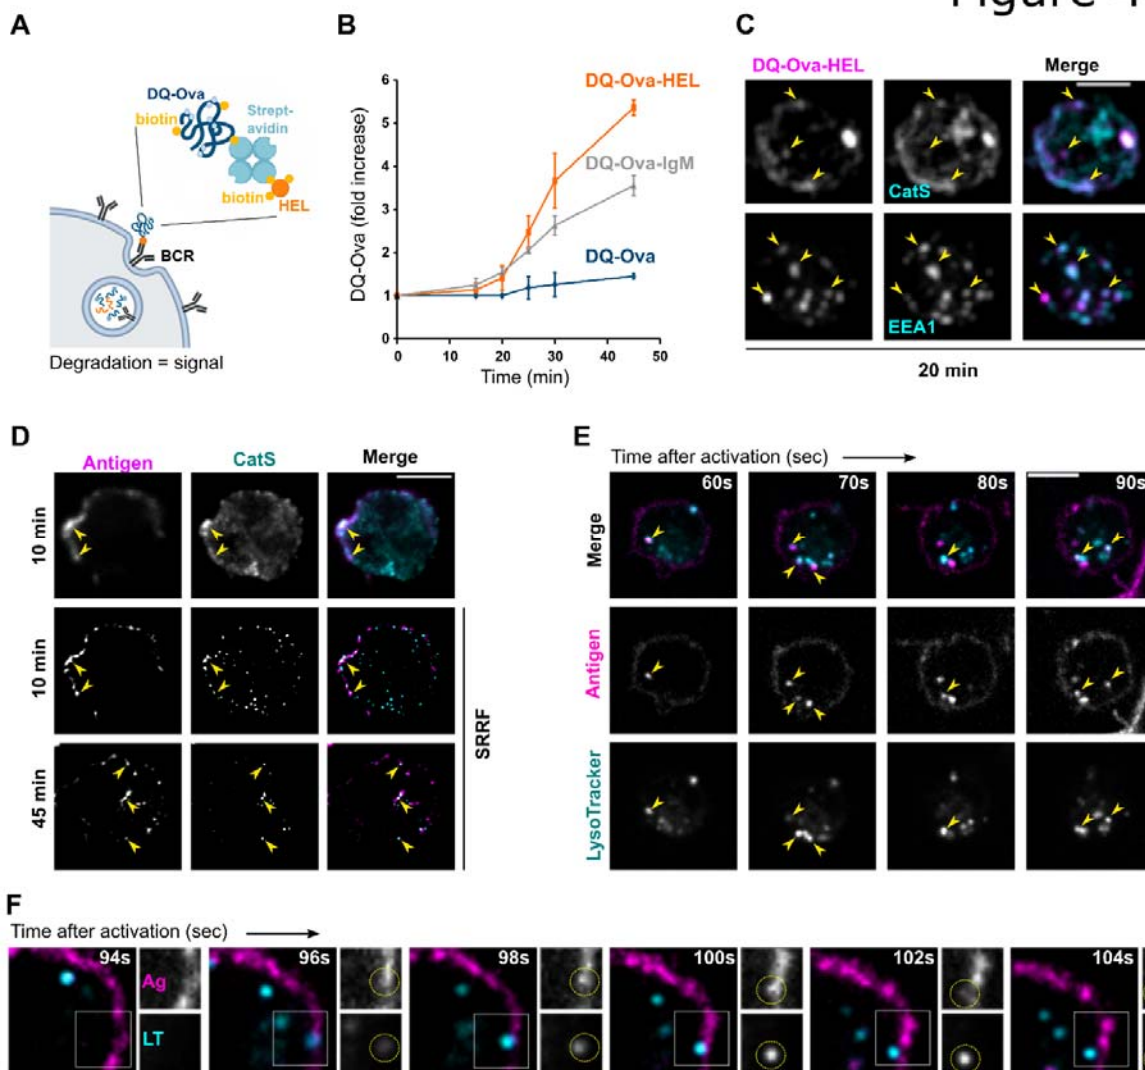

800  
801  
802  
803  
804  
805  
806  
807  
808  
809  
810  
811  
812  
813  
814  
815  
816  
817  
818

**Figure 4. Internalised antigen incorporates into vesicles with low pH and capability to degrade cargo.** **A** Schematic view of preparing DQ-Ova-antigen (HEL) sandwich to probe proteolysis of antigen internalised by the BCR. **B** DQ-Ova and DQ-Ova-antigen ( $\alpha$ IgM or HEL) degradation assessed by flow cytometry. Cells were labelled as in **A**, washed, and incubated for different timepoints at 37°C and fluorescence of DQ-OVA was acquired immediately. Results are shown as fold increase (mean  $\pm$ SD of the DQ-OVA intensity, normalized to the intensity at time zero).  $N > 2$  independent experiments. **C** A20 D1.3 cells activated with DQ-Ova-HEL (magenta) as in **B**, for 20 min, were immunostained for EEA1 or CatS (cyan). Images were acquired using SDCM with EVOLVE (EMCCD) camera. Z-projections of representative cells ( $n = 3$  independent experiments) are shown with examples of colocalising vesicles pointed to with yellow arrow-heads. Scale bar 5  $\mu$ m. **D** A20 D1.3 cells activated with AF647- $\alpha$ IgM (antigen, magenta) for 10 or 45 min and immunostained for CatS (cyan) were imaged with conventional SDCM (upper panel, single plane) or with iterative imaging to obtain SRRF super-resolution image (20-25 frames/plane) (middle and bottom panels). Examples of colocalising vesicles are pointed to with yellow arrowheads. Scale bar 5  $\mu$ m. **E-F** A20 D1.3 were loaded with LysoTracker (cyan) and activated with AF488 F(ab)<sup>2</sup>- $\alpha$ IgM (antigen, magenta). Live-imaging was performed with SDCM with EVOLVE (EMCCD) camera every 2s (**E**) or 500 ms (**F**), starting as soon as possible after transition of the cells to 37°C under the microscope. (**E**) A timelapse from a representative cell is shown and examples of colocalising vesicles are pointed to with yellow arrowheads. Scale bar 5  $\mu$ m. See supplementary Movie 2. (**F**) A timelapse of an example movie highlighting a probable fusion event between an internalising antigen vesicle and a LT vesicle (dashed yellow circle). A white square in the merge image (left) depicts the region of the split channel insets. See supplementary Movie 3.

## Figure 5

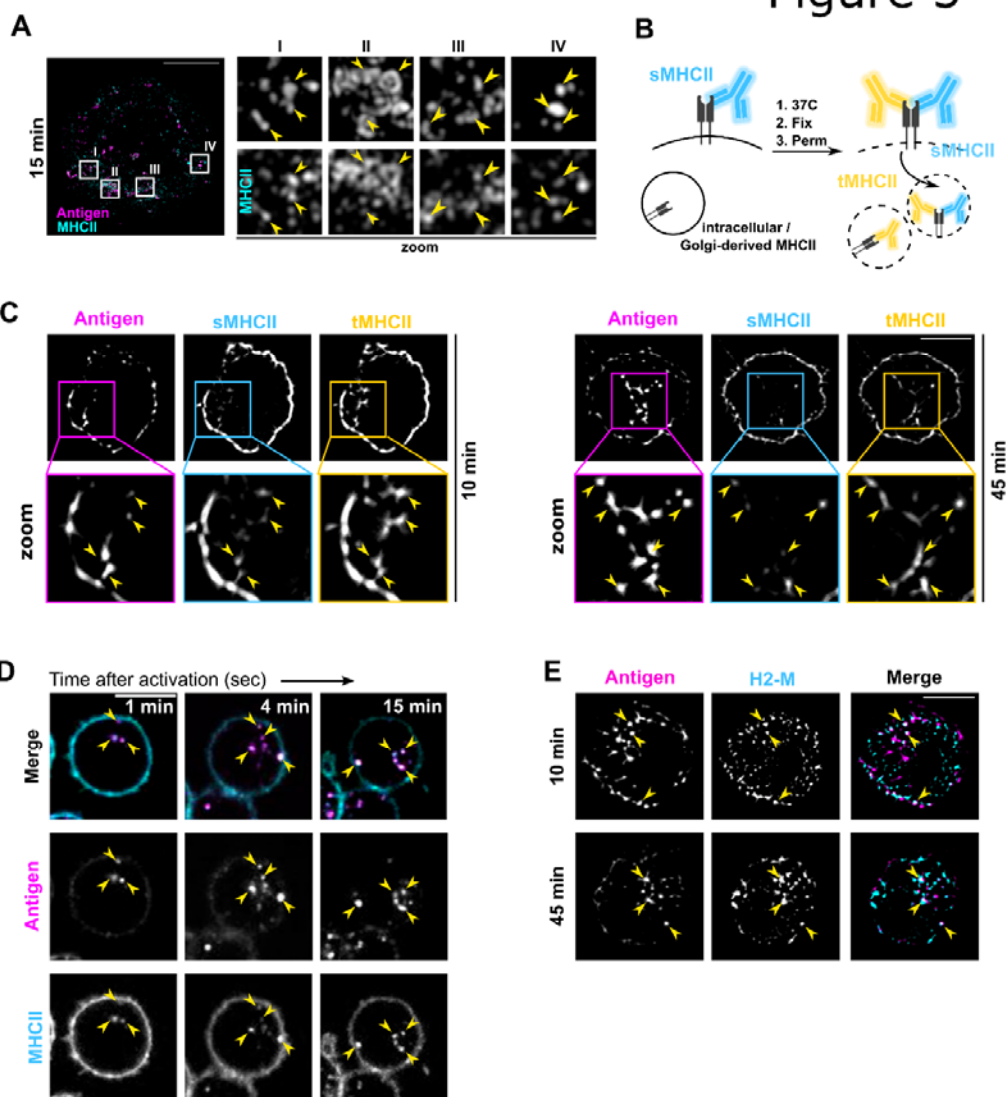

819  
820  
821  
822  
823  
824  
825  
826  
827  
828  
829  
830  
831  
832  
833  
834

**Figure 5. Antigen and surface-derived MHCII rapidly converge after internalisation.** **A** SIM imaging of A20 D1.3 cells activated with AF647- $\alpha$ IgM (antigen, magenta) for 15 min and immunostained for MHC-II (cyan). A representative cell (stack image; 0.125  $\mu$ m step size) is shown on the left with white squares indicating insets I-IV shown on panel on the right. Scale bar 5  $\mu$ m. **B** A schematic view on the staining to distinguish surface-derived MHCII from the total pool, used in C-D. **C** A20 D1.3 cells (plane image; antigen in magenta) were stained with anti-MHCII antibodies (AF488) before activation with RRx- $\alpha$ IgM (antigen, magenta) to labelling surface-bound MHCII (sMHCII in cyan). After activation of 10 or 45 min at 37°C, cells were fixed and permeabilised to stain with anti-MHCII antibody and a secondary antibody (AF633; tMHCII, yellow). Samples were imaged with iterative imaging of a single plane with SDCM (20-25 frames/plane) and post-processed to obtain SRRF super-resolution image. The panel on top shows a representative cell with white square depicting the region for the zoom-in in the lower panel. Examples of colocalising vesicles are pointed to with yellow arrowheads. Scale bar 5  $\mu$ m. **D** Live imaging of A20D1.3 stained on ice with AF488-anti-MHCII antibodies (cyan) and RRx- $\alpha$ IgM (antigen, magenta). Samples were imaged every 5 seconds using SDCM after 1 min at 37 °C (ORCA camera). A timelapse from a representative cell is shown and examples of colocalising vesicles are pointed to with yellow arrowheads. Scale bar 5  $\mu$ m. See supplementary Movie 4. **E** SRRF imaging of A20 D1.3 cells activated with AF647- $\alpha$ IgM (antigen, magenta) for 10 or 45 min and immunostained for H2-M (cyan). A representative cell is shown and examples of colocalising vesicles are pointed to with yellow arrow-heads. Scale bar 5  $\mu$ m.
